# Supplementary material for: Post-traumatic stress disorder can be predicted in hospitalized blunt trauma patients using a simple screening tool
Source: HighWire-hosted journal article supplement (doi:10.1136/tsaco-2020-000623), 2021-03-01
Supplement: tsaco-2020-000623supp001_data_supplement.pdf [file tsaco-2020-000623supp001_data_supplement.pdf]

## Level 1 Trauma

### **Physiologic Criteria:**

- Traumatic Cardiopulmonary arrest
- GCS  $\leq 12$  **OR** GCS  $< 14$  currently taking anticoagulants (ASA and Plavix included)
- Any confirmed SBP  $\leq 100$  from scene to WMC arrival
- Any patient with a HR  $>$  than SBP
- Respiratory distress (rate  $\geq 10$  or  $\geq 29$ ) **AND/OR** airway compromise
- Any ongoing blood or blood products transfusing for hemodynamic maintenance
- ANY and **ALL** intubated patients- **OR**-patients in need of emergent airway

### **Anatomic Criteria:**

- Penetrating injury to the head, torso, neck, or groin area
- Uncontrolled external bleeding
- Clinically **unstable** pelvic fractures: Diastasis symphysis pubis  $\geq 5$ cm; SI joint widening; Butterfly fragment fracture (all 4 pubic rami fractured), base deficit  $\geq 10$
- **Two or more** long bone fractures
- Amputations of any extremity (excluding digits)
- Poly-Trauma (**2 or more** involved systems)
- **ALL PREGNANT PATIENTS  $\geq 28$  weeks** gestation after major trauma
- Significant Burns  $\geq 15\%$  TBSA associated with trauma injury (including inhalation injury)
- High Speed Collision ( $\geq 30$  MPH) Age  $\geq 65$  years of age with gross injury
- Spinal Cord injury/paralysis

## Level 2 Trauma

### **Mechanism of Injury:**

- High Speed Collision ( $\geq 30$  MPH) **without** gross injury
- Unrestrained Passenger involved in a rollover
- Pedestrian, motorcycle or bicycle impacted at  $\geq 20$  MPH
- Falls  $\geq 10$  feet-**OR**-any fall with a (+) LOC  $\geq 65$  years of age
- Motorist/Cyclist/Rider separated from object (motorcycle/bicycle/ATV/horse/snow mobile/dirt bike)
- Vehicular Ejection **OR** prolonged extrication ( $\geq 20$  min)
- Death of another occupant in the same vehicle

### **Physiologic Criteria:**

- GCS 13-15

### **Anatomic Criteria:**

- Clinically **stable** pelvic fracture
- **One** long bone fracture

Supplementary Figure 1: Westchester Medical Center Adult Trauma Activation Criteria
