# Supplementary material for: Post-traumatic stress disorder can be predicted in hospitalized blunt trauma patients using a simple screening tool
Source: HighWire-hosted journal article supplement (doi:10.1136/tsaco-2020-000623), 2021-03-01
Supplement: tsaco-2020-000623supp002_data_supplement.pdf [file tsaco-2020-000623supp002_data_supplement.pdf]

**Severity of Acute Stress Symptoms—Adult\***  
**\*National Stressful Events Survey Acute Stress Disorder Short Scale (NSESSS)**

Name: \_\_\_\_\_ Age: \_\_\_\_\_ Sex: Male  Female  Date: \_\_\_\_\_

Please list the traumatic event that you experienced: \_\_\_\_\_

Date of the traumatic event: \_\_\_\_\_

**Instructions:** People sometimes have problems after extremely stressful events or experiences. How much have you been bothered during the PAST SEVEN (7) DAYS by each of the following problems that occurred or became worse after an extremely stressful event/experience? **Please respond to each item by marking (✓ or x) one box per row.**

|                                                              |                                                                                                                                                                                                                                                                                |                            |                            |                            |                            | Clinician Use              |            |
|--------------------------------------------------------------|--------------------------------------------------------------------------------------------------------------------------------------------------------------------------------------------------------------------------------------------------------------------------------|----------------------------|----------------------------|----------------------------|----------------------------|----------------------------|------------|
|                                                              |                                                                                                                                                                                                                                                                                | Not at all                 | A little bit               | Moderately                 | Quite a bit                | Extremely                  | Item score |
| 1.                                                           | Having "flashbacks," that is, you suddenly acted or felt as if a stressful experience from the past was happening all over again (for example, you reexperienced parts of a stressful experience by seeing, hearing, smelling, or physically feeling parts of the experience)? | <input type="checkbox"/> 0 | <input type="checkbox"/> 1 | <input type="checkbox"/> 2 | <input type="checkbox"/> 3 | <input type="checkbox"/> 4 |            |
| 2.                                                           | Feeling very emotionally upset when something reminded you of a stressful experience?                                                                                                                                                                                          | <input type="checkbox"/> 0 | <input type="checkbox"/> 1 | <input type="checkbox"/> 2 | <input type="checkbox"/> 3 | <input type="checkbox"/> 4 |            |
| 3.                                                           | Feeling detached or distant from yourself, your body, your physical surroundings, or your memories?                                                                                                                                                                            | <input type="checkbox"/> 0 | <input type="checkbox"/> 1 | <input type="checkbox"/> 2 | <input type="checkbox"/> 3 | <input type="checkbox"/> 4 |            |
| 4.                                                           | Trying to avoid thoughts, feelings, or physical sensations that reminded you of a stressful experience?                                                                                                                                                                        | <input type="checkbox"/> 0 | <input type="checkbox"/> 1 | <input type="checkbox"/> 2 | <input type="checkbox"/> 3 | <input type="checkbox"/> 4 |            |
| 5.                                                           | Being "super alert," on guard, or constantly on the lookout for danger?                                                                                                                                                                                                        | <input type="checkbox"/> 0 | <input type="checkbox"/> 1 | <input type="checkbox"/> 2 | <input type="checkbox"/> 3 | <input type="checkbox"/> 4 |            |
| 6.                                                           | Feeling jumpy or easily startled when you hear an unexpected noise?                                                                                                                                                                                                            | <input type="checkbox"/> 0 | <input type="checkbox"/> 1 | <input type="checkbox"/> 2 | <input type="checkbox"/> 3 | <input type="checkbox"/> 4 |            |
| 7.                                                           | Being extremely irritable or angry to the point where you yelled at other people, got into fights, or destroyed things?                                                                                                                                                        | <input type="checkbox"/> 0 | <input type="checkbox"/> 1 | <input type="checkbox"/> 2 | <input type="checkbox"/> 3 | <input type="checkbox"/> 4 |            |
| <b>Total/Partial Raw Score:</b>                              |                                                                                                                                                                                                                                                                                |                            |                            |                            |                            |                            |            |
| <b>Prorated Total Raw Score: (if 1 item left unanswered)</b> |                                                                                                                                                                                                                                                                                |                            |                            |                            |                            |                            |            |
| <b>Average Total Score:</b>                                  |                                                                                                                                                                                                                                                                                |                            |                            |                            |                            |                            |            |

Kilpatrick DG, Resnick HS, Friedman, MJ. Copyright © 2013 American Psychiatric Association. All rights reserved. This measure can be reproduced without permission by researchers and by clinicians for use with their patients.

Supplementary Figure 2: National Stressful Events Survey Acute Stress Disorder Short Scale
